# Supplementary material
Source: PubMed Central journal article supplement (PMC5541863)
Supplement: 2017_171819-Disclosures_and_Contributions.pdf [file 2017_171819-Disclosures_and_Contributions.pdf]

Haematologica  
HAEMATOL/2017/171819  
Version 1  
p27 in FLT3-driven AML: Many roads lead to ruin

Iris Z Uras, Florian Bellutti, and Veronika Sexl

Disclosures: none

Contributions: VS was the principal investigator and takes primary responsibility for the paper; IZU, FB and VS wrote the manuscript.
